# Supplementary material
Source: PubMed Central journal article supplement (PMC8691562)
Supplement: ivab064_supplementary_data.pdf [file ivab064_supplementary_data.pdf]

## SUPPLEMENTARY MATERIAL

Supplementary Table 1: Histological grading criteria for semiquantitative evaluation

| Evaluation items                    | Grade definition |                                              |                                                                   |                                                          |                                   |
|-------------------------------------|------------------|----------------------------------------------|-------------------------------------------------------------------|----------------------------------------------------------|-----------------------------------|
|                                     | 0                | 1                                            | 2                                                                 | 3                                                        | 4                                 |
| Regenerated wall, maturity          |                  |                                              |                                                                   |                                                          |                                   |
| Granulation tissue                  | None             | Very slight near suture site or around patch | Proliferation from suture site to around patch or luminal surface | Proliferation across the entire patch                    |                                   |
| Smooth muscle cells                 | None             | Very few near suture site or around patch    | Proliferation from suture site to around patch or luminal surface | Diffuse proliferation across the patch                   |                                   |
| Collagen fibres                     | None             | Very few near suture site                    | Half the thickness of native vascular wall                        | Same thickness as native vascular wall                   | Thicker than native vascular wall |
| Endothelial cells (luminal surface) | None             | Covering luminal surface near suture site    | Covering luminal surface almost entirely                          | Covering luminal surface entirely                        |                                   |
| Elastic fibres                      | None             | Very slight at luminal surface               | Slight proliferation across entire luminal surface                | Considerable proliferation across entire luminal surface |                                   |

|                                 |      |                              |                                            |                               |                                 |
|---------------------------------|------|------------------------------|--------------------------------------------|-------------------------------|---------------------------------|
| Bridge formation                | None | Little near suture site      | Some near suture site and other in the SHF | Across almost the entire area | Across the entire area          |
| Inflammatory cells infiltration |      |                              |                                            |                               |                                 |
| Neutrophils                     | None | Barely visible at HPM (×400) | Barely visible at MPM (×100)               | Clearly visible at LPM (×40)  | High concentration at LPM (×40) |
| Lymphocytes                     | None | Barely visible at HPM (×400) | Barely visible at MPM (×100)               | Clearly visible at LPM (×40)  | High concentration at LPM (×40) |
| Plasma cells                    | None | Barely visible at HPM (×400) | Barely visible at MPM (×100)               | Clearly visible at LPM (×40)  | High concentration at LPM (×40) |
| Macrophages / giant cells       | None | Barely visible at HPM (×400) | Barely visible at MPM (×100)               | Clearly visible at LPM (×40)  | High concentration at LPM (×40) |
| Material condition (SHF)        |      |                              |                                            |                               |                                 |
| Gelatin remaining               | None | ≤30%                         | About 50%                                  | 50% to 80%                    | Almost 100%                     |
| Calcium deposition              | None | Slight                       | Mild                                       | Moderate                      | Marked                          |

Modified from Nemoto *et al.* Eur J Cardiothorac Surg 2018;54:318-27.

HPM: high power magnification; MPM: medium power magnification; LPM: low power magnification; SHF: synthetic hybrid fabric.

Supplementary Table 2: Quantitative scoring (acute stage to 36 months)

| Evaluation items                       | Implantation period |                    |                     |                     |                      |                      |                      |
|----------------------------------------|---------------------|--------------------|---------------------|---------------------|----------------------|----------------------|----------------------|
|                                        | 2 weeks<br>(n = 4)  | 1 month<br>(n = 2) | 3 months<br>(n = 2) | 6 months<br>(n = 1) | 12 months<br>(n = 3) | 24 months<br>(n = 2) | 36 months<br>(n = 2) |
| Regenerated wall, maturity             |                     |                    |                     |                     |                      |                      |                      |
| Tissue regeneration                    |                     |                    |                     |                     |                      |                      |                      |
| Granulation tissue                     | 1, 1, 2, 3          | 1, 1               | 2, 1                | 1                   | 1, 0, 1              | 0, 0                 | 0, 0                 |
| Smooth muscle cells                    | 0, 0, 2, 3          | 3, 2               | 1, 2                | 1                   | 1, 2, 2              | 3, 3                 | 2, 2                 |
| Collagen fibres                        | 0, 0, 2, 3          | 3, 3               | 3, 3                | 3                   | 4, 2, 2              | 2, 3                 | 2, 2                 |
| Endothelial cells<br>(luminal surface) | 1, 1, 3, 3          | 3, 3               | 3, 3                | 3                   | 3, 3, 3              | 3, 3                 | 3, 3                 |
| Elastic fibres                         | 0, 0, 0, 0          | 1, 0               | 0, 1                | 1                   | 0, 2, 0              | 1, 2                 | 1, 1                 |
| Bridge formation                       | 0, 0, 1, 1          | 1, 1               | 1, 3                | 4                   | 1, 3, 4              | 4, 3                 | 4, 4                 |
| Inflammatory cells infiltration        |                     |                    |                     |                     |                      |                      |                      |
| Neutrophils                            | 0, 0, 0, 0          | 0, 0               | 0, 0                | 0                   | 0, 0, 0              | 0, 0                 | 0, 0                 |
| Lymphocytes                            | 0, 0, 0, 0          | 0, 0               | 1, 0                | 0                   | 0, 1, 1              | 1, 1                 | 1, 0                 |
| Plasma cells                           | 0, 0, 0, 0          | 0, 0               | 0, 0                | 0                   | 0, 0, 0              | 0, 0                 | 0, 0                 |
| Macrophages / giant cells              | 0, 0, 1, 1          | 1, 1               | 2, 2                | 1                   | 1, 1, 3              | 1, 1                 | 1, 0                 |
| Material condition (SHF)               |                     |                    |                     |                     |                      |                      |                      |
| Gelatin remaining                      | 4, 4, 3, 3          | 2, 2               | 1, 1                | 0                   | 2, 1, 1              | 0, 0                 | 0, 0                 |
| Calcium deposition                     | 0, 0, 0, 0          | 0, 0               | 0, 0                | 0                   | 0, 0, 0              | 0, 0                 | 0, 0                 |

Data up to 6 months are reproduced from Nemoto *et al.* Eur J Cardiothorac Surg 2018;54:318-27. Elastic fibres are additionally evaluated.

SHF: synthetic hybrid fabric.

Supplementary Figure 1: Changes over time in representative histological images (acute stage to 36 months; haematoxylin and eosin staining).

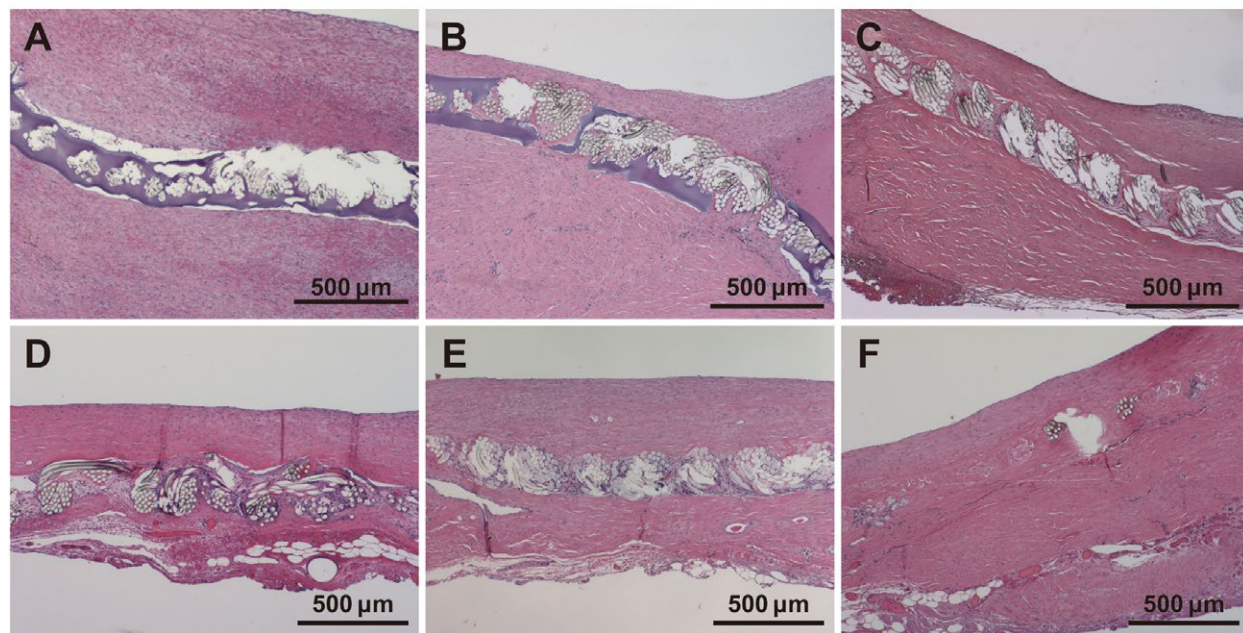

(A) 1 month, (B) 3 months, (C) 6 months, (D) 12 months, (E) 24 months, (F) 36 months after implantation. (A-C) were created from pathology specimens prepared for a previous publication (Nemoto *et al.* Eur J Cardiothorac Surg 2018;54:318-27).
